# Supplementary material for: The Relative Timing of Mutations in a Breast Cancer Genome
Source: PLoS One. 2013 Jun 10;8(6):e64991. doi: 10.1371/journal.pone.0064991 (PMC3677865; doi:10.1371/journal.pone.0064991)
Supplement: File S3 — Details of statistical model. (PDF) [file pone.0064991.s003.pdf]

### Statistical estimates of the number of non-randomly distributed mutations.

Suppose that  $X_1, X_2, \dots, X_m$  is an independent sample of size  $m$ , each taking values in  $\{0, 1\}$ . Of the  $m$  observations, an unknown number  $n$  take the value 1 whereas the other  $m - n$  are Bernoulli random variables having

$$\mathbb{P}(X_i = 1) = p = 1 - \mathbb{P}(X_i = 0), \quad i = 1, 2, \dots, m - n. \quad (1)$$

The random variable  $Y = X_1 + \dots + X_m$  is observed, and the aim is to estimate the parameter  $n$  and provide some assessment of confidence in that estimate. In the present setting,  $m$  is the total number of mutations that are classified as either early or late,  $n$  is the number that must be early, and  $p$  is the probability that an unselected mutation is classified as early.

It is straightforward to calculate the distribution of  $Y$ . To obtain  $Y = y$ , the  $m - n$  randomly classified mutations must result in  $y - n$  being early. Hence we have

$$\mathbb{P}(Y = y) = \binom{m - n}{y - n} p^{y - n} (1 - p)^{m - y}, \quad y = n, n + 1, \dots, m. \quad (2)$$

To find the maximum likelihood estimator (MLE) of  $n$ , we assume that  $y$  and  $p$  are given, so that the likelihood for the unknown parameter  $n$  is, from (2),

$$\begin{aligned} L(n) &= \binom{m - n}{y - n} p^{y - n} (1 - p)^{m - y}, \quad n = 0, 1, \dots, y; \\ &= 0, \quad n > y. \end{aligned}$$

The likelihood  $L(n)$  can be maximized numerically, for example using the statistical environment R; the MLE need not be unique. Upper and lower confidence intervals for  $n$  may be found using the method described in Tingley and Li (1993). R code that implements this approach may be obtained from the authors.

### Reference

Tingley M, Li C (1993) A note on obtaining confidence intervals for discrete parameters. The American Statistician 47:20-23.
